# Supplementary material for: Synthesis of 4-thio-5-(2′′-thienyl)uridine and cytotoxicity activity against colon cancer cells in vitro
Source: Royal Society of Chemistry journal article supplement (doi:10.1039/c6ra14356c), 2016-01-01

## Supporting information

### Synthesis of 4-thio-5-(2''-thienyl)uridine and cytotoxicity activity against colon cancer cells *in vitro*

Xiaohui Zhang,<sup>a</sup> Depeng Li,<sup>a</sup> Jianzhong Qin,<sup>a</sup> Yaozhong Xu<sup>\*c</sup> and Kedong Ma<sup>\*a</sup>

<sup>a</sup> *College of Environment and Chemical Engineering, Dalian University, Dalian 116622, PR China. E-mail: [makedongdl@yahoo.co.jp](mailto:makedongdl@yahoo.co.jp); Tel/Fax: +86-411-87402440*

<sup>b</sup> *School of Life Science and Biotechnology, Dalian University, Dalian 116622, China*

<sup>c</sup> *Department of Life, Health and Chemical Sciences, the Open University, Walton Hall, Milton Keynes, MK7 6AA, UK. E-mail: [y.z.xu@open.ac.uk](mailto:y.z.xu@open.ac.uk)*

### Supporting information Figure Captions:

**S.Fig.1** UV spectrum of 4-thio-5-(2''-thienyl)uridine

**S.Fig.2** MS spectrum of 4-thio-5-(2''-thienyl)uridine

**S.Fig.3** NMR spectrum of 4-thio-5-(2''-thienyl)uridine (<sup>1</sup>H NMR and <sup>13</sup>C NMR)

**S.Fig.4** The Molecular structure and absolute configuration of 4-thio-5-(2''-thienyl)uridine

Figure S1

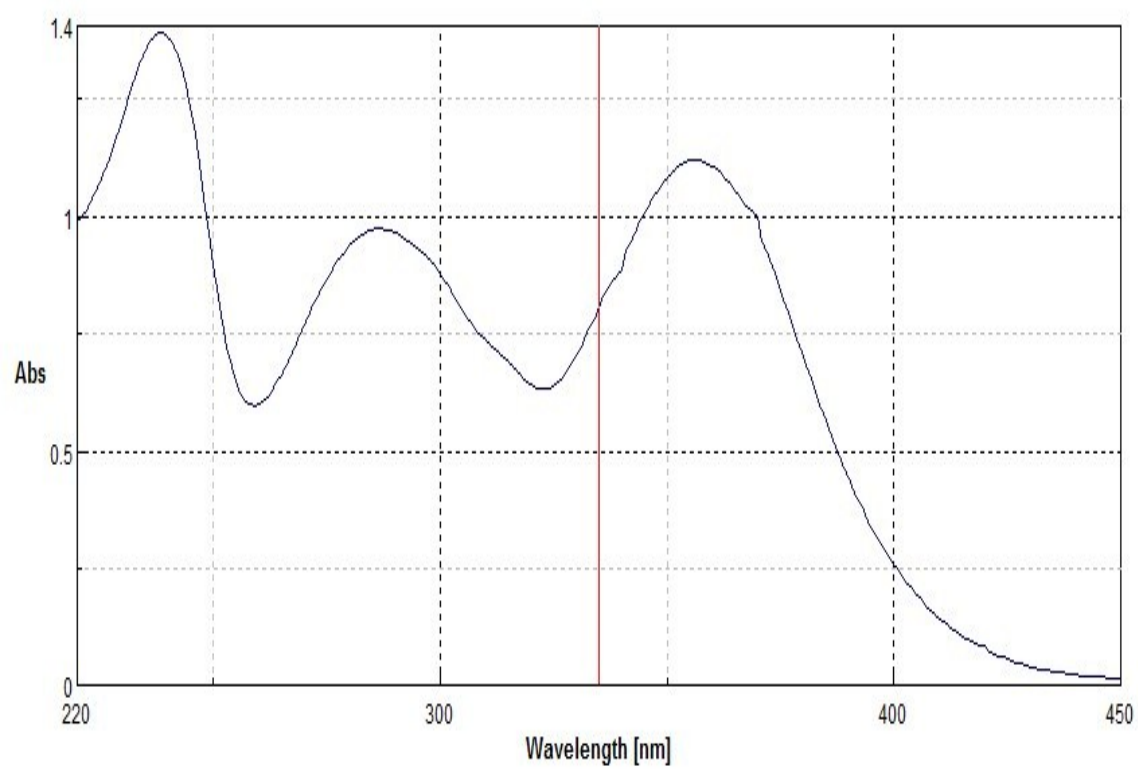

Figure S2

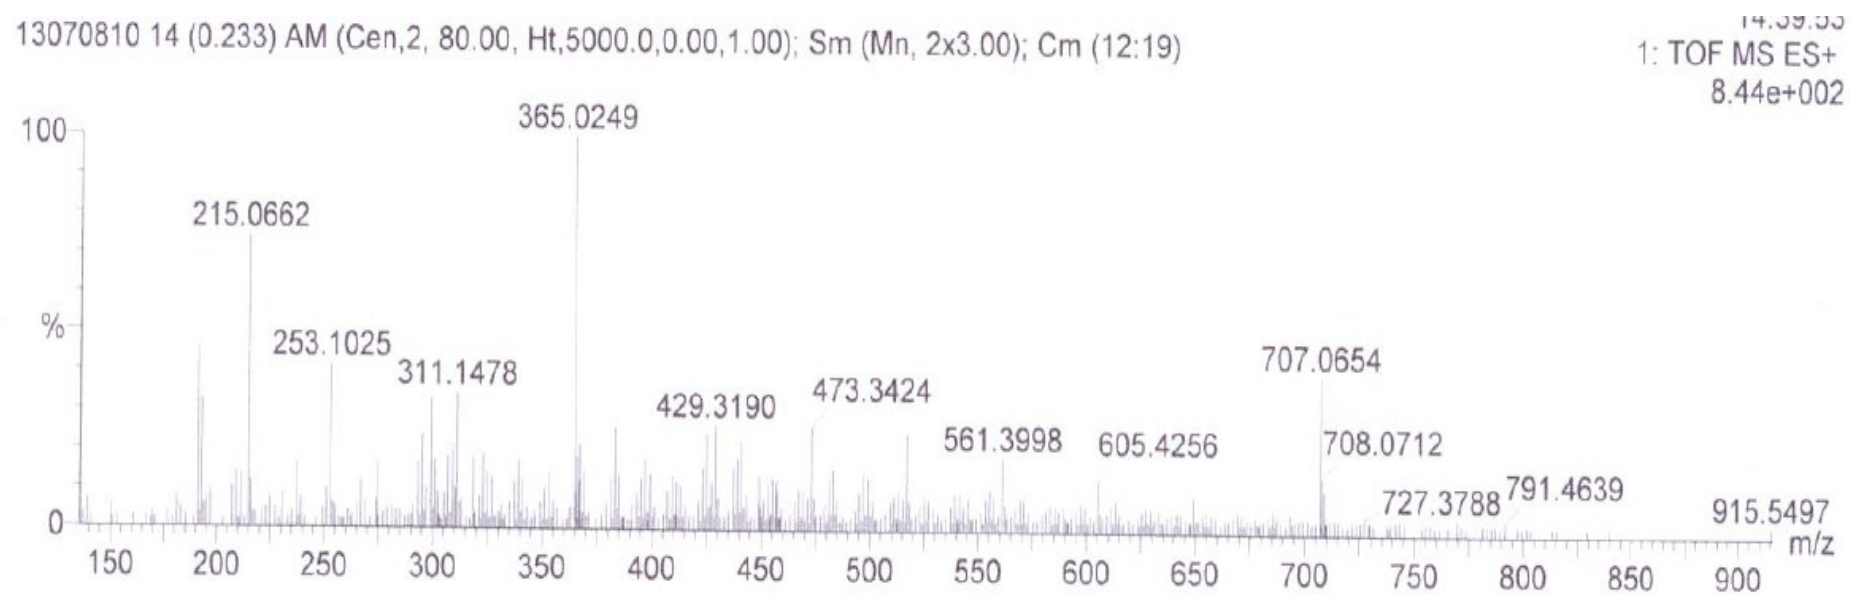

Figure S3

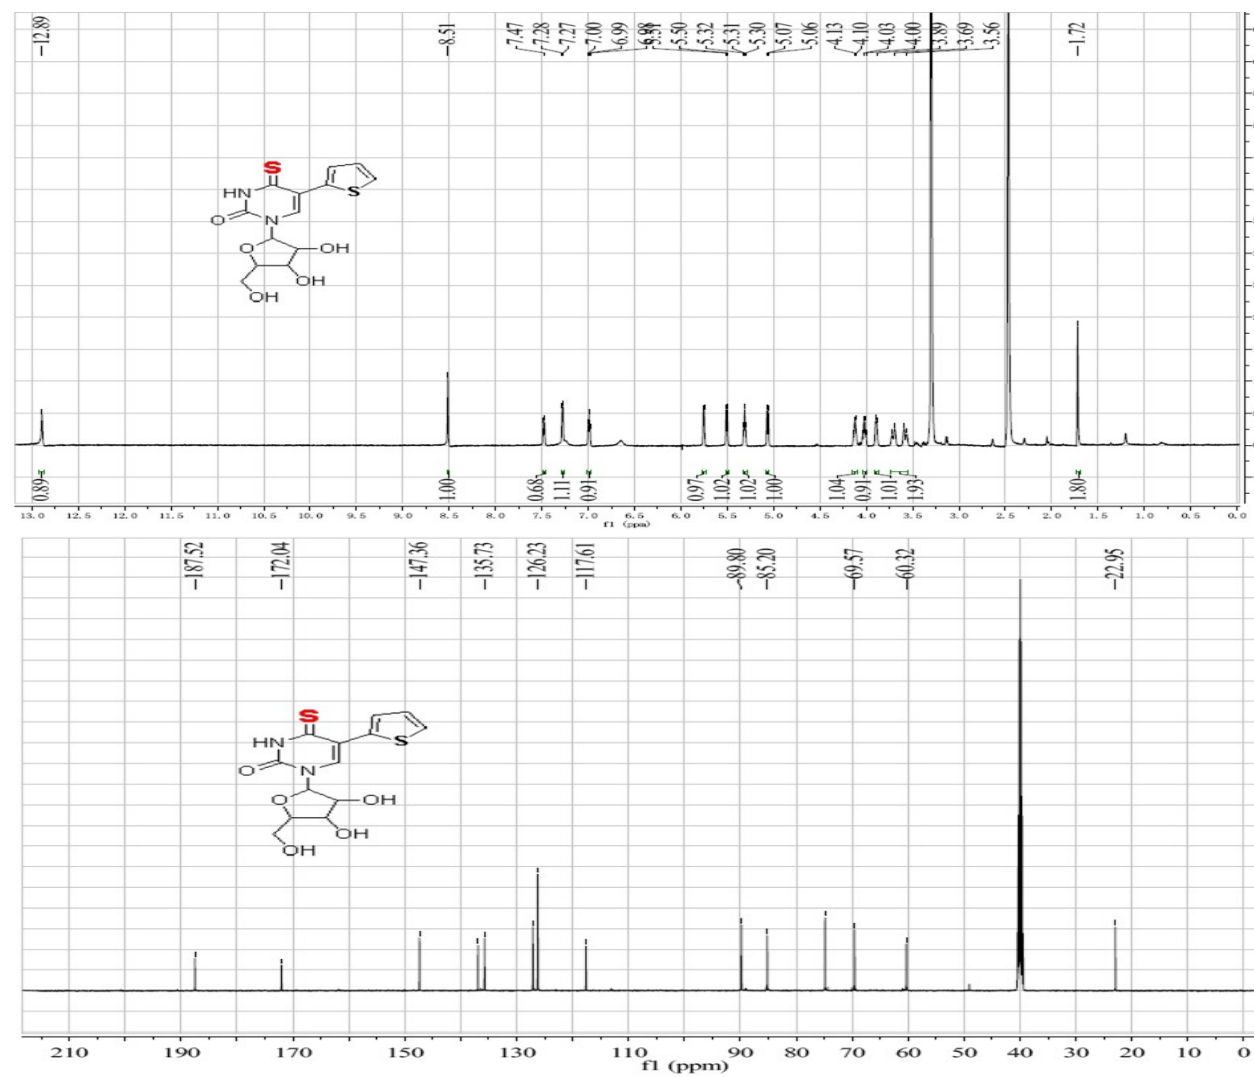

Figure S4

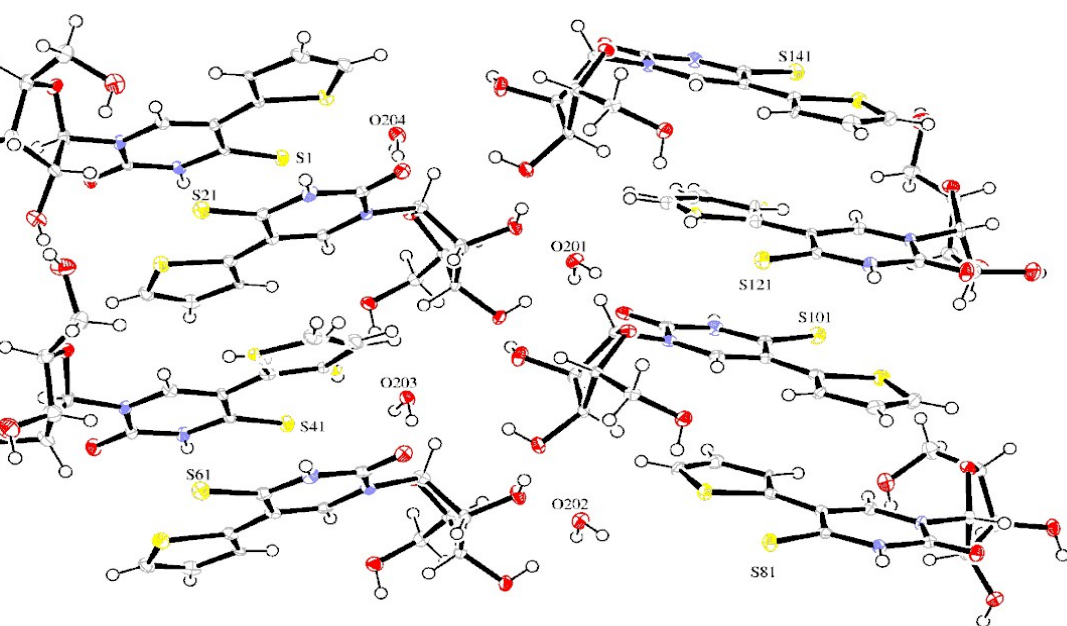

Supplement: c6ra14356c1.pdf [file c6ra14356c1.pdf]
